# Supplementary material for: Hydroxychloroquine/chloroquine for the treatment of hospitalized patients with COVID-19: An individual participant data meta-analysis
Source: PLOS journal article supplement (doi:10.1371/journal.pone.0273526), 2022-09-29
Supplement: S6 (10.1371/journal.pone.0273526.s006) [file journal.pone.0273526.s006]

**S3 Table. Changes to the Prespecified Statistical Analysis Plan**

| When the change was made                                                                     | Change                                                                                                                                                                                                                                    | Reason                                                                                                                                                                                                                                                                                                                                                                                                                             |
|----------------------------------------------------------------------------------------------|-------------------------------------------------------------------------------------------------------------------------------------------------------------------------------------------------------------------------------------------|------------------------------------------------------------------------------------------------------------------------------------------------------------------------------------------------------------------------------------------------------------------------------------------------------------------------------------------------------------------------------------------------------------------------------------|
| After examining baseline covariates and outcome missingness, but not outcome data themselves | We decided to extend the outcome definition from day 28-30 post-enrollment to day 28-35 post-enrollment. A patient's outcome was taken to be their earliest recorded ordinal score between day 28 and day 35 post-enrollment (inclusive). | Missingness in the outcome measurements. The change increased the number of patients with valid outcome values from 90.3% to 95.3%.                                                                                                                                                                                                                                                                                                |
|                                                                                              | We decided to use a simple count of those comorbidities without significant missingness in place of a weighted Charlson (or Charlson-like) comorbidity score.                                                                             | Missingness in baseline comorbidity indicators; not having requested standard Charlson indicators from each site.                                                                                                                                                                                                                                                                                                                  |
|                                                                                              | We simplified the safety variables under consideration.                                                                                                                                                                                   | Extensive missingness in QTc and elevated LFTs AE/SAE results.                                                                                                                                                                                                                                                                                                                                                                     |
|                                                                                              | We modified the form of our prespecified regression model for the primary outcome.                                                                                                                                                        | Following establishing the total sample size and simulating outcome data from the empirical distribution of baseline patient characteristics.                                                                                                                                                                                                                                                                                      |
| After examining/analyzing the outcome data                                                   | We decided to use superpopulation rather than finite sample standardized estimators of treatment effect for our primary outcome analysis.                                                                                                 | For three reasons: (1) the uncertainty in the superpopulation estimator is more directly comparable to that of the maximum likelihood estimator; (2) the finite-sample estimator requires assumptions about the dependence between individual-level potential outcomes; and (3) our choice of assumption—to treat the potential outcomes as independent—potentially made the associated uncertainty intervals misleadingly narrow. |
|                                                                                              | We set as missing BMIs less than 10 and greater than 70; for the outcome analysis, these were imputed in the same step as the other baseline covariates using multiple imputation.                                                        | Extremeness of these values.                                                                                                                                                                                                                                                                                                                                                                                                       |
|                                                                                              | We decided not to fit a category-specific ordinal model as a sensitivity analysis.                                                                                                                                                        | Time and effort; the reasonable within-sample fit of the simpler models.                                                                                                                                                                                                                                                                                                                                                           |

| When the change was made | Change                                                                                                                                                                                | Reason                                                                                                                                                                                                                       |
|--------------------------|---------------------------------------------------------------------------------------------------------------------------------------------------------------------------------------|------------------------------------------------------------------------------------------------------------------------------------------------------------------------------------------------------------------------------|
|                          | We decided to de-emphasize our pre-specified conditional effect measure (relative risk of mechanical ventilation/ECMO or death).                                                      | The associated uncertainty intervals were extremely wide, perhaps due to the flexibility of our prespecified model.                                                                                                          |
|                          | We decided to include model-standardized estimates of the risk difference for mortality, both overall and by subgroup.                                                                | This was considered informative and straightforward, given the model. Additionally, risk differences are considered a more interpretable measure of subgroup effects than odds ratios because of their collapsibility [1,2]. |
|                          | We decided to include a subgroup analysis based on quintiles of a baseline risk score.                                                                                                | Following recommendations of Kent et al [3].                                                                                                                                                                                 |
|                          | We decided not to examine whether site × treatment interactions are associated with site-level covariates or individual-level covariates averaged within sites.                       | There was very little variation in the estimated site × treatment interactions.                                                                                                                                              |
|                          | We replaced mortality at day 28-30 as a safety outcome with mortality at day 28-35 as a secondary outcome, and conducted an analysis of this parallel to that of our primary outcome. | We had prespecified all-cause mortality at or before day 28/30 as a safety outcome. However, we judged that an analysis of mortality parallel to that of our primary outcome would be clinically relevant.                   |
|                          | In the primary outcome and mortality analyses, we treated 6 extreme BMI values (<10 or >70) as missing.                                                                               | We suspected that these values were mistaken or could bias our results, and were unable to definitively establish their accuracy.                                                                                            |
|                          | We added an exploratory post-hoc subgroup analysis based on time between symptom onset and enrollment.                                                                                | Suggested in review.                                                                                                                                                                                                         |

## References

1. Didelez V, Stensrud MJ. On the logic of collapsibility for causal effect measures. *Biom J.* 2021;64: 235-242. doi:10.1002/bimj.202000305
2. Greenland S. Noncollapsibility, confounding, and sparse-data bias. Part 1: the oddities of odds. *J Clin Epidemiol.* 2021;138: 178-181. doi:10.1016/j.jclinepi.2021.06.007
3. Kent DM, Paulus JK, van Klaveren D, D'Agostino R, Goodman S, Hayward R, et al. The Predictive Approaches to Treatment effect Heterogeneity (PATH) statement. *Ann Int Med.* 2020;172: 35-45. doi:10.7326/M18-3667
